# Supplementary material for: A Study on Survival Analysis Methods Using Neural Network to Prevent Cancers
Source: MDPI journal article supplement (doi:10.3390/cancers15194757), 2023-09-27
Supplement: s1 [file s1]

**Table S1.** Hyperparameters of DNN models. Description and range of each hyperparameter: learning rate - Beginning learning rate (1e-5 - 1e-1) ; optimizer - Optimization method (Adam, RMSprop); epoch - Number of trials of inner loop/epoch (1-10 for DeepSurv and DeepHit, 1-4 for nDeep and Multi-nDeep) ; p dropout - Rate of dropping out the nodes (0.0 - 0.8).

| Model       | Hyperparameters                                     | Thyroid                                     | Gastric                                    | Breast                                     | Colorectal                                 | Lung                                       | Prostate                                | Liver                                      | Kidney                                     | Uterus-Cervical                            | Lymphoma                                  |
|-------------|-----------------------------------------------------|---------------------------------------------|--------------------------------------------|--------------------------------------------|--------------------------------------------|--------------------------------------------|-----------------------------------------|--------------------------------------------|--------------------------------------------|--------------------------------------------|-------------------------------------------|
| DeepSurv    | learning_rate<br>optimizer<br>n_epochs<br>p_dropout | 0.041920202<br>RMSprop<br>10<br>0.183634881 | 0.000118351<br>Adam<br>9<br>0.31973134     | 0.004134312<br>Adam<br>10<br>0.094106354   | 0.000151401<br>Adam<br>10<br>0.206362516   | 0.003950026<br>Adam<br>4<br>0.539981643    | 0.000836143<br>Adam<br>5<br>0.253549335 | 5.32E-05<br>Adam<br>6<br>0.043863264       | 0.099151413<br>Adam<br>4<br>0.788817713    | 7.15E-05<br>Adam<br>3<br>0.775532345       | 0.08306069<br>Adam<br>6<br>0.707465165    |
| DeepHit     | learning_rate<br>optimizer<br>n_epochs<br>p_dropout | 0.001096384<br>Adam<br>8<br>0.601865894     |                                            |                                            |                                            |                                            | 7.55E-05<br>Adam<br>7<br>0.053397595    |                                            |                                            |                                            |                                           |
| nDeep       | learning_rate<br>optimizer<br>n_epochs<br>p_dropout | 0.001887609<br>RMSprop<br>4<br>0.007023522  | 0.001385036<br>RMSprop<br>3<br>0.008543556 | 0.038016289<br>RMSprop<br>4<br>0.055343576 | 0.001925324<br>RMSprop<br>3<br>0.167942658 | 0.000811696<br>RMSprop<br>3<br>0.002501462 | 0.008291019<br>Adam<br>4<br>0.000163165 | 0.000639385<br>RMSprop<br>3<br>0.002007299 | 0.004502712<br>Adam<br>3<br>0.000334646    | 0.003476174<br>RMSprop<br>3<br>0.003730368 | 0.00099045<br>RMSprop<br>3<br>0.005387184 |
| Multi-nDeep | learning_rate<br>optimizer<br>n_epochs<br>p_dropout | 0.004059415<br>Adam<br>4<br>0.039516671     |                                            | 0.015921436<br>RMSprop<br>2<br>0.003251124 |                                            |                                            | 0.090245464<br>Adam<br>4<br>0.240899609 |                                            | 0.000485033<br>RMSprop<br>3<br>0.208187035 |                                            |                                           |

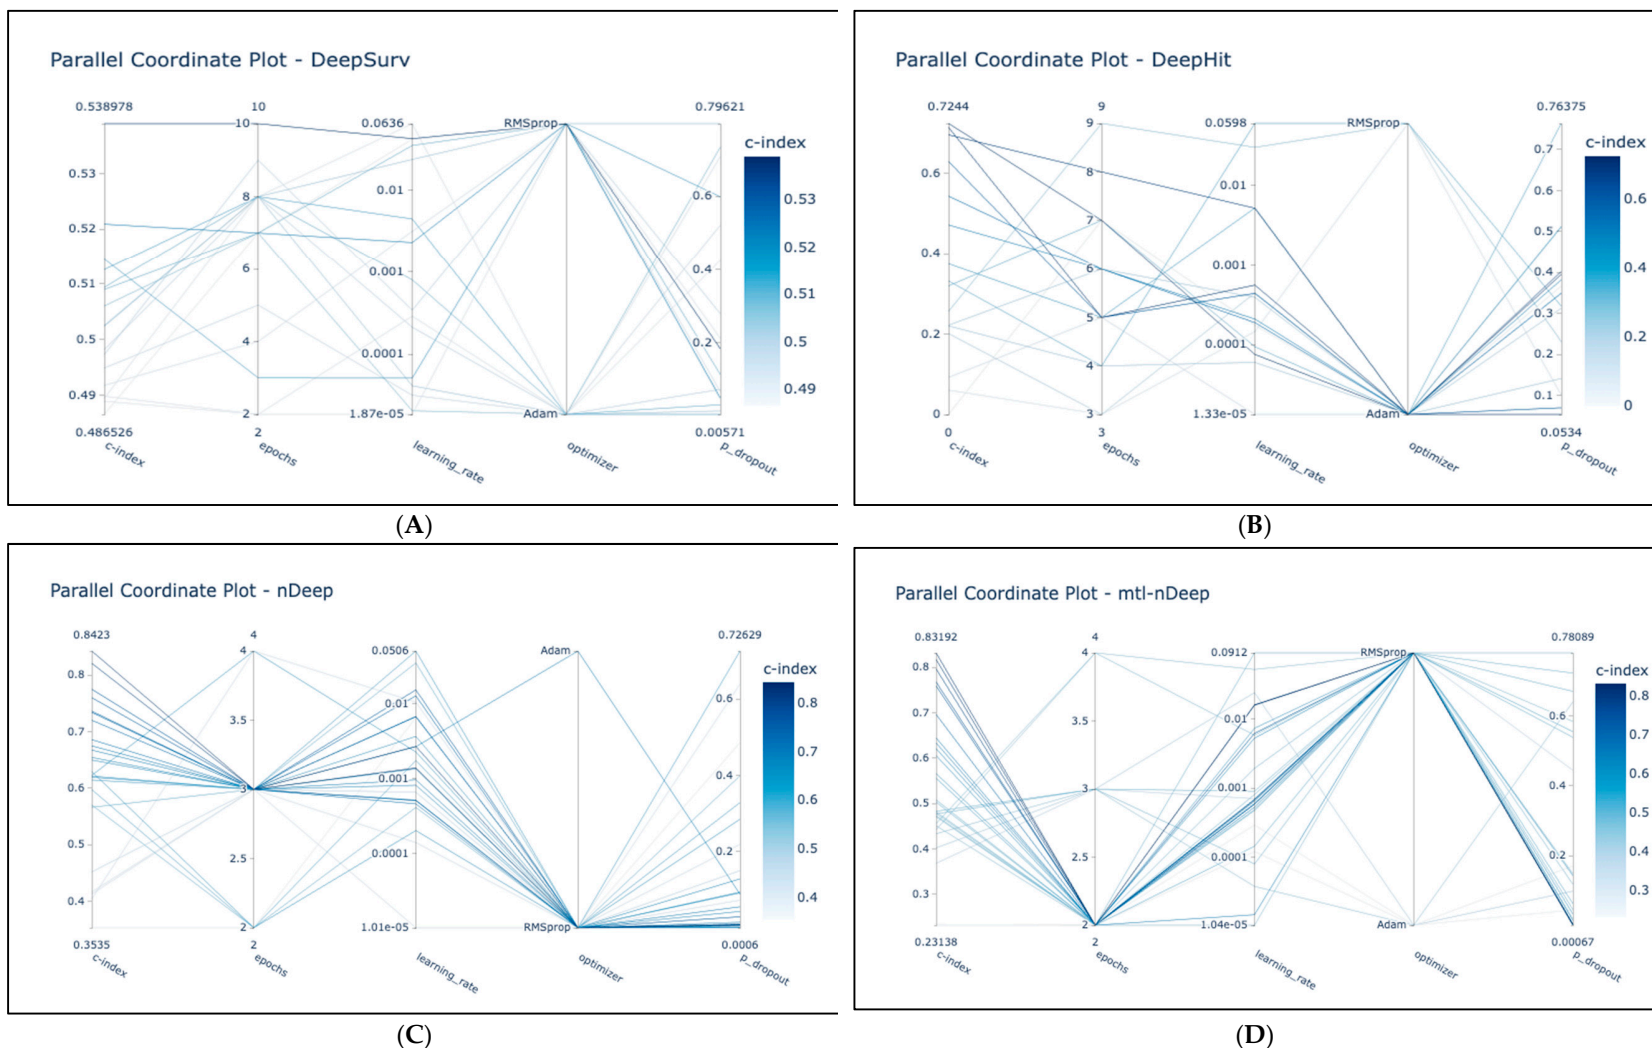

**Figure S1.** Hyperparameters optimization of 4 models bases on TPE algorithms. (A) DeepSurv on thyroid cancer; (B) DeepHit on prostate, liver, kidney, uterus-cervical, and lymphoma cancer; (C) nDeep on gastric cancer; (D) Multi-nDeep on breast, colorectal, and lung cancer. For multitask-learning models (Multi-nDeep and DeepHit), the mean c-index among tasks was used as the criteria for hyperparameter tuning. As can be shown, the parallel coordinate plots of nDeep and Multi-nDeep are more convergent than those of DeepSurv and DeepHit.

**Table S2.** C-index of each model and imputation method.

| Model    | Target           | Imputation by mean |                 | Imputation by median |                 | Imputation by regression |                 |
|----------|------------------|--------------------|-----------------|----------------------|-----------------|--------------------------|-----------------|
|          |                  | Test               | Test-cases only | Test                 | Test-cases only | Test                     | Test-cases only |
| Cox PH   | Thyroid          | 0.6752             | 0.6171          | 0.6667               | 0.6197          | 0.6798                   | 0.6656          |
|          | Gastric          | 0.7560             | 0.6889          | 0.7578               | 0.6797          | 0.7574                   | 0.5739          |
|          | Breast           | 0.8250             | 0.7941          | 0.8177               | 0.8020          | 0.8255                   | 0.7008          |
|          | Colorectal       | 0.7290             | 0.5987          | 0.7152               | 0.5581          | 0.7267                   | 0.5563          |
|          | Lung             | 0.8247             | 0.6629          | 0.8254               | 0.6215          | 0.8248                   | 0.5669          |
|          | Prostate         | 0.8741             | 0.8066          | 0.8632               | 0.7862          | 0.7197                   | 0.6107          |
|          | Liver            | 0.8270             | 0.5189          | 0.8268               | 0.5020          | 0.6896                   | 0.5003          |
|          | Kidney           | 0.6986             | 0.6931          | 0.6941               | 0.5991          | 0.5724                   | 0.5583          |
|          | Uterine-cervical | 0.8146             | 0.8167          | 0.8105               | 0.7897          | 0.6694                   | 0.7497          |
|          | Lymphoma         | 0.6976             | 0.5957          | 0.6887               | 0.5523          | 0.6268                   | 0.5119          |
| DeepSurv | Thyroid          | 0.4955             | 0.4996          | 0.4518               | 0.4731          | 0.4713                   | 0.4966          |
|          | Gastric          | 0.4614             | 0.4754          | 0.4889               | 0.4794          | 0.4492                   | 0.4888          |
|          | Breast           | 0.4816             | 0.4788          | 0.4576               | 0.4737          | 0.4936                   | 0.4844          |
|          | Colorectal       | 0.4813             | 0.4863          | 0.4978               | 0.4897          | 0.4756                   | 0.4983          |
|          | Lung             | 0.4739             | 0.4903          | 0.4922               | 0.4853          | 0.4441                   | 0.4971          |
|          | Prostate         | 0.4739             | 0.4966          | 0.4854               | 0.4793          | 0.4390                   | 0.4883          |
|          | Liver            | 0.4951             | 0.4907          | 0.4590               | 0.4758          | 0.4500                   | 0.4747          |
|          | Kidney           | 0.4687             | 0.4880          | 0.4722               | 0.4794          | 0.4689                   | 0.4807          |
|          | Uterine-cervical | 0.4810             | 0.4767          | 0.4471               | 0.4836          | 0.4845                   | 0.4826          |
|          | Lymphoma         | 0.4741             | 0.4900          | 0.4514               | 0.4908          | 0.4979                   | 0.4739          |
| DeepHit  | Thyroid          | 0.6304             | 0.6966          | 0.6343               | 0.6430          | 0.6115                   | 0.6721          |
|          | Gastric          | 0.6682             | 0.6583          | 0.6768               | 0.6321          | 0.6187                   | 0.6006          |
|          | Breast           | 0.7949             | 0.6140          | 0.7981               | 0.5705          | 0.7303                   | 0.5752          |
|          | Colorectal       | 0.6530             | 0.5569          | 0.6511               | 0.5884          | 0.5967                   | 0.5262          |
|          | Lung             | 0.7485             | 0.6574          | 0.7654               | 0.5765          | 0.6845                   | 0.5724          |
|          | Prostate         | <b>0.8962</b>      | 0.7300          | 0.8957               | 0.7502          | 0.8653                   | 0.7109          |
|          | Liver            | 0.8822             | 0.7418          | 0.8767               | 0.7203          | 0.8196                   | 0.7366          |
|          | Kidney           | 0.6619             | 0.6271          | 0.6678               | 0.7000          | 0.6456                   | 0.6659          |

| Model           | Target           | Imputation by mean |                 | Imputation by median |                 | Imputation by regression |                 |
|-----------------|------------------|--------------------|-----------------|----------------------|-----------------|--------------------------|-----------------|
|                 |                  | Test               | Test-cases only | Test                 | Test-cases only | Test                     | Test-cases only |
| nDeep           | Uterine-cervical | 0.7989             | 0.5958          | 0.7959               | 0.6073          | 0.7627                   | 0.5828          |
|                 | Lymphoma         | 0.6232             | 0.7254          | 0.6197               | 0.6468          | 0.5922                   | 0.6678          |
|                 | Thyroid          | 0.8201             | 0.8459          | 0.8210               | 0.8468          | 0.8185                   | 0.8462          |
|                 | Gastric          | 0.8506             | 0.8609          | <b>0.8525</b>        | 0.8708          | 0.8517                   | 0.8604          |
|                 | Breast           | 0.8240             | 0.8436          | 0.8241               | 0.8332          | 0.8226                   | 0.8439          |
|                 | Colorectal       | 0.8418             | 0.8649          | 0.8450               | 0.8513          | 0.8427                   | 0.8484          |
|                 | Lung             | 0.8875             | 0.8893          | 0.8869               | 0.8870          | 0.8862                   | 0.8901          |
|                 | Prostate         | 0.8509             | 0.8694          | 0.8506               | 0.8436          | 0.8526                   | 0.8626          |
|                 | Liver            | 0.8838             | 0.8879          | 0.8861               | 0.8934          | 0.8844                   | 0.8869          |
|                 | Kidney           | <b>0.8368</b>      | 0.8334          | 0.8327               | 0.8552          | 0.8264                   | 0.8330          |
|                 | Uterine-cervical | 0.8330             | 0.8494          | 0.8259               | 0.8476          | 0.8306                   | 0.8456          |
| Multitask nDeep | Lymphoma         | 0.8433             | 0.8487          | 0.8415               | 0.8531          | <b>0.8455</b>            | 0.8591          |
|                 | Thyroid          | 0.8201             | 0.8459          | 0.8208               | 0.8468          | <b>0.8210</b>            | 0.8458          |
|                 | Gastric          | 0.8511             | 0.8609          | 0.8474               | 0.8708          | 0.8514                   | 0.8605          |
|                 | Breast           | <b>0.8246</b>      | 0.8430          | 0.8229               | 0.8325          | 0.8197                   | 0.8422          |
|                 | Colorectal       | 0.8411             | 0.8643          | 0.8449               | 0.8524          | <b>0.8464</b>            | 0.8493          |
|                 | Lung             | <b>0.8922</b>      | 0.8978          | 0.8858               | 0.8868          | 0.8867                   | 0.8913          |
|                 | Prostate         | 0.8510             | 0.8696          | 0.8498               | 0.8436          | 0.8478                   | 0.8626          |
|                 | Liver            | 0.8856             | 0.9086          | <b>0.8865</b>        | 0.9088          | 0.8848                   | 0.8797          |
|                 | Kidney           | 0.8279             | 0.8334          | 0.8302               | 0.8552          | 0.8317                   | 0.8284          |
|                 | Uterine-cervical | 0.8327             | 0.8494          | <b>0.8369</b>        | 0.8476          | 0.8328                   | 0.8444          |
|                 | Lymphoma         | 0.8421             | 0.8487          | 0.8352               | 0.8531          | 0.8404                   | 0.8565          |

**Table S3.** C-index of variants of Cox PH models.

| Model                 | Target           | Imputation by mean | Imputation by median | Imputation by regression |
|-----------------------|------------------|--------------------|----------------------|--------------------------|
| L1 regularized-Cox PH | Thyroid          | 0.6009             | 0.6045               | 0.6045                   |
|                       | Gastric          | 0.6523             | 0.6607               | 0.6624                   |
|                       | Breast           | 0.7002             | 0.6977               | 0.7236                   |
|                       | Colorectal       | 0.6705             | 0.6226               | 0.6558                   |
|                       | Lung             | 0.7139             | 0.7473               | 0.7566                   |
|                       | Prostate         | 0.8518             | 0.8248               | 0.8161                   |
|                       | Liver            | 0.8297             | 0.8286               | 0.8279                   |
|                       | Kidney           | 0.5801             | 0.5861               | 0.6514                   |
|                       | Uterine-cervical | 0.7300             | 0.7061               | 0.6900                   |
|                       | Lymphoma         | 0.6496             | 0.6791               | 0.5500                   |
| L2 regularized-Cox PH | Thyroid          | 0.6179             | 0.6535               | 0.6613                   |
|                       | Gastric          | 0.7325             | 0.6714               | 0.5929                   |
|                       | Breast           | 0.7709             | 0.8147               | 0.7715                   |
|                       | Colorectal       | 0.7315             | 0.5773               | 0.5949                   |
|                       | Lung             | 0.7826             | 0.7272               | 0.4760                   |
|                       | Prostate         | 0.8847             | 0.8614               | 0.6117                   |
|                       | Liver            | 0.8264             | 0.5624               | 0.4889                   |
|                       | Kidney           | 0.6689             | 0.6760               | 0.5498                   |
|                       | Uterine-cervical | 0.8285             | 0.8360               | 0.6483                   |
|                       | Lymphoma         | 0.6832             | 0.6169               | 0.6293                   |
